# Supplementary material
Source: PubMed Central journal article supplement (PMC6331275)
Supplement: NIHMS1515415-supplement-3.pdf [file NIHMS1515415-supplement-3.pdf]

**Supplementary Figure 1.** Effects of age and high fat diet on hippocampal and amygdala PSD- 95. A) CA1, B) CA3, C) hilus, D) medial amygdala (MeA), E) basolateral amygdala (BLA), F) central amygdala (CeA) intensity of PSD-95 labelling. Data are mean +/- SEM. G) representative images of PSD-95-labelling in the hilus. Scale bar = 50 m.
